# Supplementary material
Source: MDPI journal article supplement (https://www.mdpi.com/2076-3263/12/2/88)
Supplement: s1 [file s1]

Article

# Successive Modes of Carbonate Precipitation in Microbialites along the Hydrothermal Spring of La Salsa in Laguna Pastos Grandes (Bolivian Altiplano)

Elodie Muller <sup>1,\*</sup>, Magali Ader <sup>1</sup>, Giovanni Aloisi <sup>1</sup>, Cédric Bougeault <sup>2</sup>, Christophe Durlet <sup>2</sup>, Emmanuelle Vennin <sup>2</sup>, Karim Benzerara <sup>3</sup>, Eric C. Gaucher <sup>4</sup>, Aurélien Virgone <sup>5</sup>, Marco Chavez <sup>6</sup>, Pierre Souquet <sup>5</sup> and Emmanuelle Gérard <sup>1</sup>

<sup>1</sup> Université de Paris, Institut de physique du globe de Paris, CNRS, F-75005 Paris, France; ader@ipgp.fr (M.A.); aloisi@ipgp.fr (G.A.); emgerard@ipgp.fr (E.G.)

<sup>2</sup> Biogéosciences, UMR 6282 CNRS, Université Bourgogne Franche-Comté, 6 boulevard Gabriel, 21000 Dijon, France; cedric.bougeault@orange.fr (C.B.); christophe.durlet@u-bourgogne.fr (C.D.); emmanuelle.vennin@u-bourgogne.fr (E.V.)

<sup>3</sup> Sorbonne Université, Muséum National d'Histoire Naturelle, UMR CNRS 7590, Institut de Minéralogie, de Physique des Matériaux et de Cosmochimie (IMPMC), 75005 Paris, France; karim.benzerara@upmc.fr

<sup>4</sup> Institute of Geological Sciences, Baltzerstrasse. 1-3, CH-3012 Bern, Switzerland; eric.gaucher@geo-unibe.ch

<sup>5</sup> Total CSTJF, Avenue Larribau, 64018 Pau CEDEX, France; aurelien.virgone@totalenergies.com (A.V.); pierre.souquet@totalenergies.com (P.S.)

<sup>6</sup> TOTAL E&P, 40 Calle Las Violetas, Edificio Arcus, Santa Cruz de la Sierra; marco.chavez@total.com

\* Correspondence: elodie.muller@ifp.fr

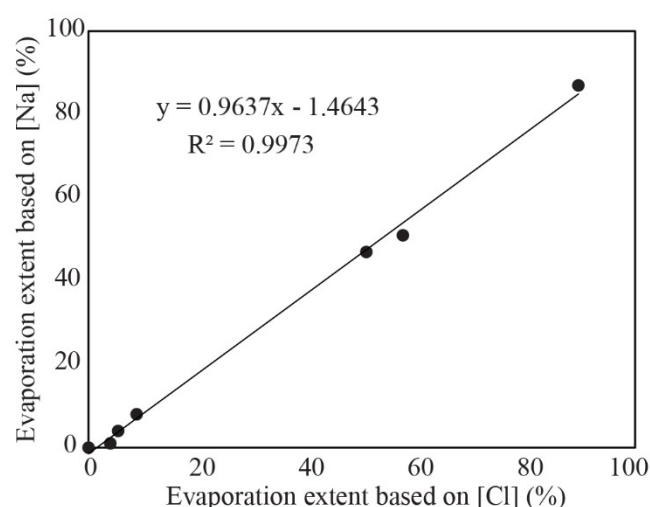

**Figure S1.** Evaporation extent (%) calculated with Na and Cl concentration along La Salsa transect.

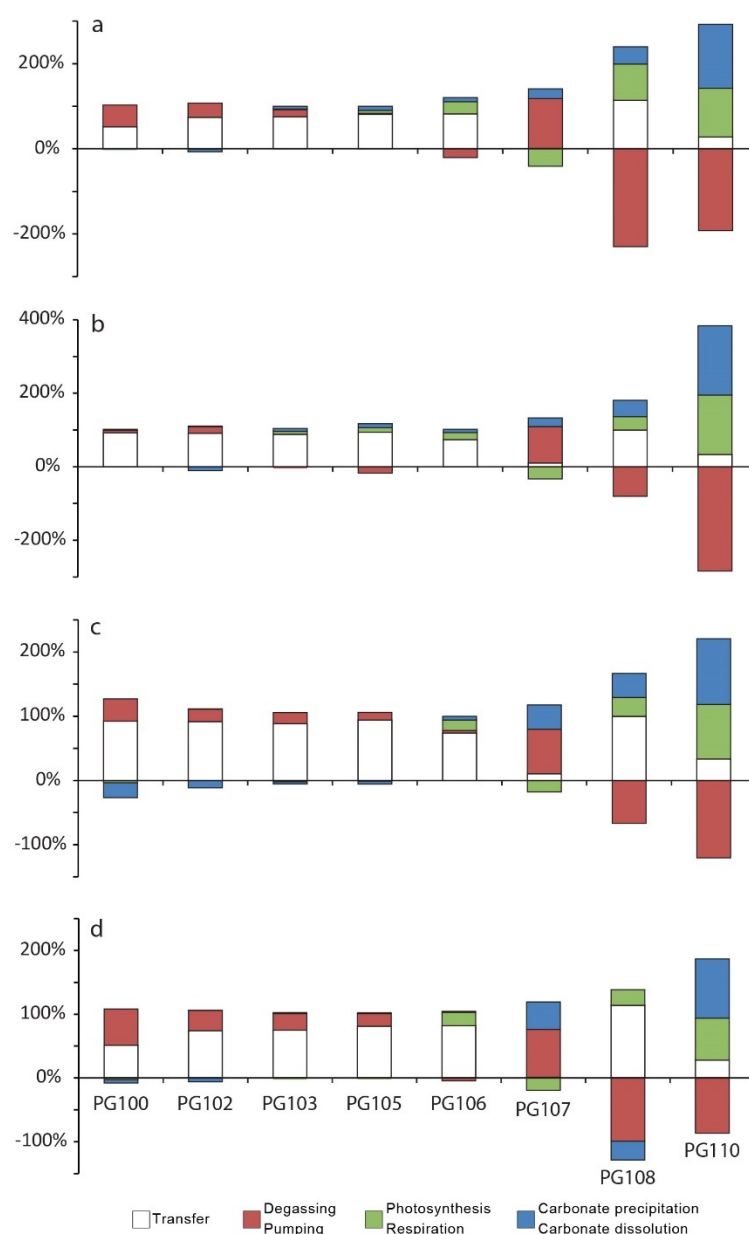

**Figure S2.** Results of the 4 modes of calculation of the DIC isotope mass balance modeling relying on a) Ca concentration to estimate carbonate precipitation and the measured alkalinity and pH to estimate the DIC (presented in the main text); b) Ca concentration to estimate carbonate precipitation and the measured DIC; c) the measured DIC to estimate the carbonate precipitation and the DIC; and d) the measured alkalinity and pH to estimate the carbonate precipitation and the DIC. In (a) and (d), the values of PG108 are divided by 10. Because the alkalinity measurement in PG107 was underestimated perhaps due to carbonate precipitation in the tube, the model relying on alkalinity measurement (d) gives different results for PG108 than the 3 other models.

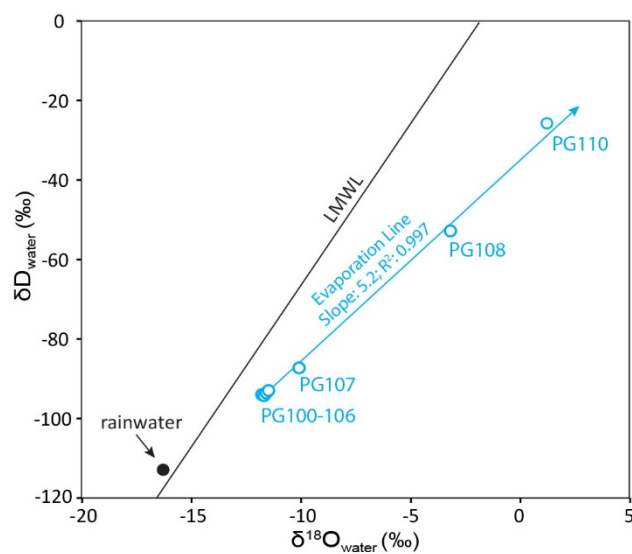

**Figure S3.** Downstream evolution of the  $\delta^{18}\text{O}$ - $\delta\text{D}$  composition of the water. The Local meteoric water line (LMWL [74]) and rainwater composition [38] are given for comparison.

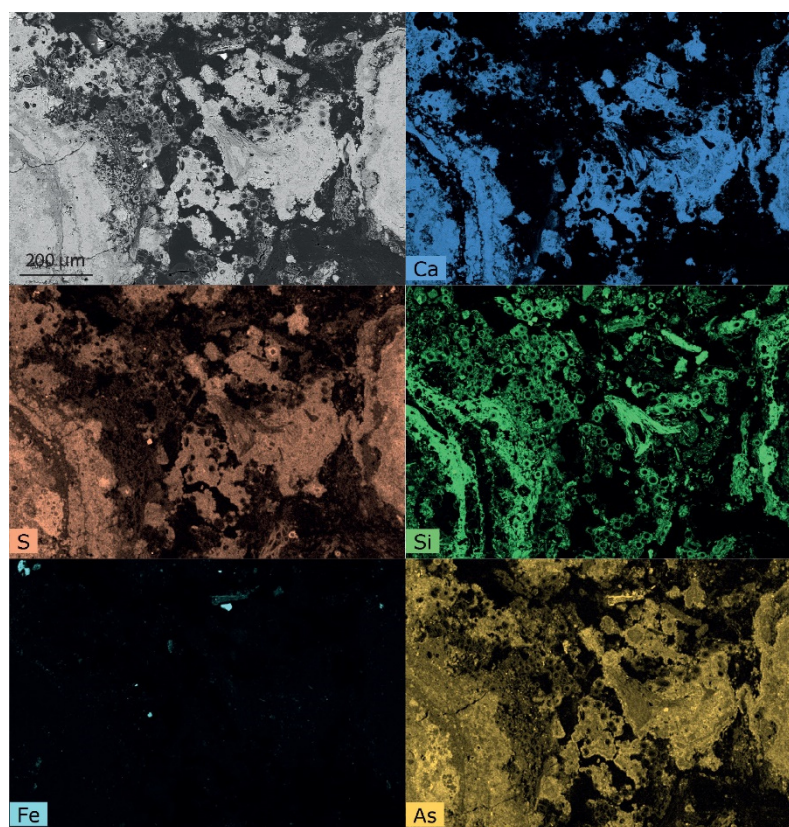

**Figure S4.** Backscattered electron (BSE) image and corresponding EDX maps of Ca (dark blue), S (orange), Si (green), Fe (light blue) and As (yellow) of the microbial mat associated with shrubs of PG108 embedded in LRwhite resin.

**Table S1.** Internal consistency of pH, alkalinity and DIC measurements calculated on PHREEQC.

|       | pH   | Option 1             |                    |      | Option 2                   |             |      | $\Delta$ DIC % |
|-------|------|----------------------|--------------------|------|----------------------------|-------------|------|----------------|
|       |      | DIC (mM $\pm 10\%$ ) | Alkalinity PHREEQC | Bal% | Alkalinity (mM $\pm 1\%$ ) | DIC PHREEQC | Bal% |                |
| PG100 | 6.9  | 9.7                  | 8.5                | 3.9  | 7.38                       | 8.4         | 4.2  | 13             |
| PG101 | 5.8  | 10.5                 | 3.6                | -0.8 | 5.7                        | 16.3        | -1.2 | -55            |
| PG102 | 6.3  | 9.6                  | 6.0                | 4.6  | 7.6                        | 12.1        | 4.3  | -26            |
| PG103 | 6.65 | 8.8                  | 7.0                | 2.8  | 7.48                       | 9.4         | 2.7  | -7             |
| PG105 | 7.2  | 8.4                  | 8.0                | 2.4  | 7.34                       | 7.8         | 2.5  | 8              |
| PG106 | 8.12 | 6.5                  | 7.2                | 2.9  | 7.34                       | 6.6         | 2.8  | -2             |
| PG107 | 8.8  | 1.2                  | 4.4                | 0.2  | 3.03*                      | 0.1         | 0.3  | 89             |
| PG108 | 8.64 | 1.4                  | 4.0                | -3.6 | 4.43                       | 1.8         | -3.7 | -27            |
| PG110 | 7.71 | 2                    | 4.5                | -1.2 | 4.56                       | 2.0         | -1.2 | -2             |

**Table S2.** Alkalinity, DIC and major elements concentrations corrected from the evaporation effect and used for the isotopic mass balance calculations.

|                               | PG100 | PG101 | PG102 | PG103 | PG105 | PG106 | PG107 | PG108 | PG110 |
|-------------------------------|-------|-------|-------|-------|-------|-------|-------|-------|-------|
| Alkalinity (mM)               | 7.38  | 5.66  | 7.57  | 7.18  | 6.94  | 6.70  | 2.1   | 1.88  | 0.47  |
| DIC                           | 8.4   | 16.3  | 12.1  | 9.1   | 7.3   | 6.0   | 0.6   | 0.8   | 0.21  |
| Na <sup>+</sup>               | 173.2 | 207.7 | 205.3 | 199.2 | 201.4 | 203.0 | 189.6 | 175.0 | 182.1 |
| K <sup>+</sup>                | 12.5  | 12.3  | 12.2  | 11.7  | 12.0  | 12.1  | 11.3  | 10.3  | 12.1  |
| Ca <sup>2+</sup>              | 10.1  | 9.9   | 11.0  | 10.2  | 9.3   | 8.6   | 7.2   | 6.9   | 5.8   |
| Mg <sup>2+</sup>              | 5.2   | 5.2   | 5.4   | 5.1   | 5.1   | 5.1   | 4.8   | 4.5   | 5.0   |
| SO <sub>4</sub> <sup>2-</sup> | 2.3   | 3.0   | 2.7   | 2.4   | 3.2   | 2.8   | 2.4   | 2.4   | 2.1   |
| Cl <sup>-</sup>               | 196.6 | 254.6 | 226.4 | 226.4 | 226.4 | 226.4 | 226.4 | 226.4 | 226.4 |
| Li <sup>+</sup>               | 9.9   | 9.9   | 9.9   | 9.6   | 9.8   | 9.9   | 9.3   | 8.6   | 9.7   |
| Sr <sup>2+</sup>              | 0.1   | 0.1   | 0.1   | 0.1   | 0.1   | 0.1   | 0.1   | 0.1   | 0.1   |
| Fe                            | 0     | 0     | 0.003 | 0.01  | 0.01  | 0     | 0     | 0     | 0     |
| B                             | 3.3   | 3.1   | 3.3   | 3.2   | 3.2   | 3.3   | 3.1   | 2.9   | 2.8   |
| Br <sup>-</sup>               | 0.07  | 0.07  | 0.07  | 0.07  | 0.07  | 0.07  | 0.06  | 0.05  | 0.04  |
| SiO <sub>2</sub> (mg/l)       | 115.9 | 115.9 | 113.7 | 111.3 | 105.5 | 88.1  | 54.9  | 49.2  | 11.3  |

**Table S3.** Errors of the DIC isotope mass balance along the hydrological profile of La Salsa obtained using the Monte Carlo method (Anderson, 1976). Each parameter was calculated 1000 times by random drawing within  $\pm 1$  sigma around the mean value.

|                       | PG100 | PG102 | PG103 | PG105 | PG106 | PG107 | PG108 | PG110 |
|-----------------------|-------|-------|-------|-------|-------|-------|-------|-------|
| P <sub>transf</sub>   | 1%    | 1%    | 1%    | 1%    | 1%    | 0.1%  | 2%    | 0.1%  |
| P <sub>deg-pump</sub> | 1%    | 2%    | 3%    | 4%    | 5%    | 4%    | 34%   | 22%   |
| P <sub>fix-resp</sub> | 1%    | 2%    | 2%    | 2%    | 4%    | 2%    | 17%   | 10%   |
| P <sub>carb</sub>     | 1%    | 1%    | 2%    | 2%    | 2%    | 2%    | 17%   | 12%   |

**Table S4.** Comparison of the results obtained with the 4 modes of calculation of the DIC isotope mass balance modeling.

|                       | PG100 | PG102 | PG103 | PG105 | PG106 | PG107 | PG108  | PG110 |
|-----------------------|-------|-------|-------|-------|-------|-------|--------|-------|
| Alkalinity and Ca     |       |       |       |       |       |       |        |       |
| P <sub>transf</sub>   | 52%   | 74%   | 75%   | 81%   | 82%   | 1%    | 1071%  | 28%   |
| P <sub>deg-pump</sub> | 51%   | 33%   | 17%   | 3%    | -20%  | 116%  | -2174% | -192% |
| P <sub>fix-resp</sub> | -2%   | 0%    | 2%    | 7%    | 28%   | -41%  | 818%   | 114%  |
| P <sub>carb</sub>     | -1%   | -7%   | 6%    | 10%   | 10%   | 23%   | 384%   | 150%  |
| DIC and Ca            |       |       |       |       |       |       |        |       |
| P <sub>transf</sub>   | 92%   | 91%   | 89%   | 94%   | 74%   | 10%   | 100%   | 33%   |
| P <sub>deg-pump</sub> | 7%    | 18%   | -4%   | -17%  | -2%   | 99%   | -81%   | -284% |
| P <sub>fix-resp</sub> | 3%    | 1%    | 8%    | 12%   | 19%   | -33%  | 36%    | 161%  |
| P <sub>carb</sub>     | -2%   | -10%  | 8%    | 10%   | 9%    | 24%   | 45%    | 189%  |
| DIC                   |       |       |       |       |       |       |        |       |
| P <sub>transf</sub>   | 92%   | 91%   | 89%   | 94%   | 74%   | 10%   | 100%   | 33%   |
| P <sub>deg-pump</sub> | 34%   | 19%   | 17%   | 12%   | 4%    | 70%   | -67%   | -121% |
| P <sub>fix-resp</sub> | -4%   | 1%    | -2%   | -1%   | 16%   | -18%  | 29%    | 85%   |
| P <sub>carb</sub>     | -23%  | -11%  | -4%   | -5%   | 6%    | 38%   | 38%    | 102%  |
| Alkalinity            |       |       |       |       |       |       |        |       |
| P <sub>transf</sub>   | 52%   | 74%   | 75%   | 81%   | 82%   | 1%    | 1140%  | 28%   |
| P <sub>deg-pump</sub> | 57%   | 32%   | 26%   | 20%   | -5%   | 75%   | -993%  | -87%  |
| P <sub>fix-resp</sub> | -3%   | 0%    | -2%   | -2%   | 21%   | -19%  | 246%   | 66%   |
| P <sub>carb</sub>     | -5%   | -6%   | 2%    | 1%    | 2%    | 43%   | -292%  | 93%   |
